# Supplementary material for: The Effect of Alkali Metals (Li, Na, and K) on Ni/CaO Dual-Functional Materials for Integrated CO2 Capture and Hydrogenation
Source: MDPI journal article supplement (doi:10.3390/ma16155430), 2023-08-02
Supplement: s1 [file s1]

## Supplementary Materials

Effect of alkali metal (Li, Na, K,) on Ni/CaO dual functional materials for integrated CO<sub>2</sub> capture and hydrogenation

Yong Hu, Qian Xu,\* Yao Sheng, Xueguang Wang,\* Hongwei Cheng, Xingli Zou,  
and Xionggang Lu

State Key Laboratory of Advanced Special Steel, School of Materials Science and Engineering, Shanghai University, 99 Shangda Road, BaoShan District, Shanghai 200444, China; huyongsh@163.com (Y.H.); hwcheng@shu.edu.cn (H.C.); xlzou@shu.edu.cn (X.Z.); luxg@shu.edu.cn (X.L.)

\* Correspondence: qianxu@shu.edu.cn (Q.X.); shengyao@shu.edu.cn (Y.S.); wxg228@shu.edu.cn (X.W.)

Total number of Pages: 6

Total number of Figures: 5

Total number of Tables: 3

**Table S1.** Weak, medium, strong and total basicity of the reduced Ni/CaO and M-Ni/CaO (M = Li, Na, K) DFMs.

| Materials | Weak basicity<br>( $\mu\text{mol/g}$ ) | Medium basicity<br>( $\mu\text{mol/g}$ ) | Strong basicity<br>( $\mu\text{mol/g}$ ) | Total basicity<br>( $\mu\text{mol/g}$ ) |
|-----------|----------------------------------------|------------------------------------------|------------------------------------------|-----------------------------------------|
| Ni/CaO    | 55.7                                   | 462.1                                    | 248.9                                    | 766.7                                   |
| Li-Ni/CaO | 120.5                                  | 321.0                                    | 131.2                                    | 572.7                                   |
| Na-Ni/CaO | 135.1                                  | 547.1                                    | 304.9                                    | 987.1                                   |
| K-Ni/CaO  | 102.8                                  | 493.5                                    | 283.2                                    | 879.5                                   |

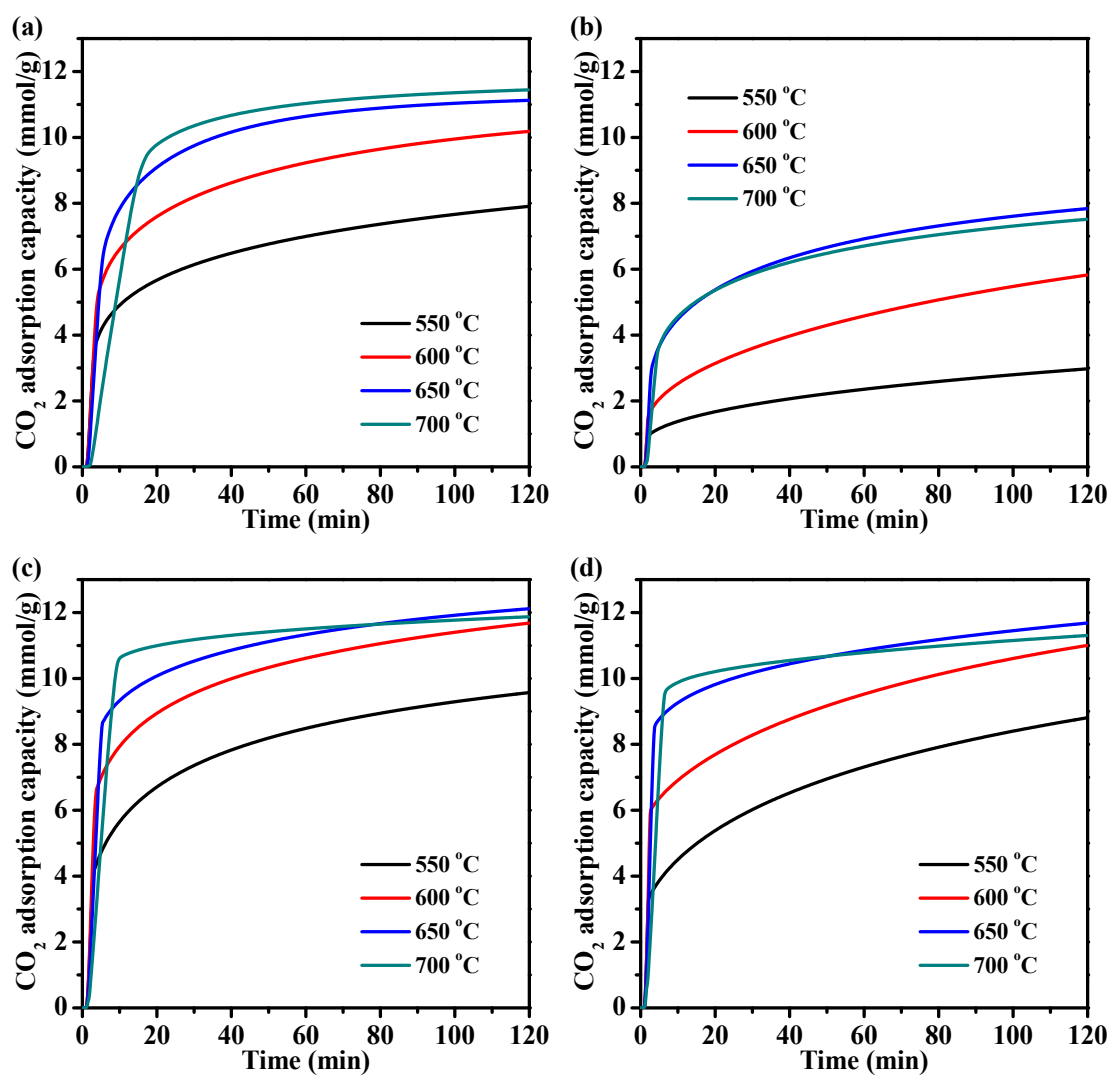

**Figure S1.** CO<sub>2</sub> capture profiles in the temperature range of 550 to 700 °C for 2 h. (a) Ni/CaO, (b) Li-Ni/CaO, (c) Na-Ni/CaO and (d) K-Ni/CaO.

**Table S2.** The CO<sub>2</sub> capture capacities of the M-Ni/CaO (M = Li, Na, K) DFMs at the temperature range of 550 – 700 °C for 2 h.

| Materials | CO <sub>2</sub> adsorption capacity (mmol/g) |        |        |        |        |
|-----------|----------------------------------------------|--------|--------|--------|--------|
|           | Theoretical value                            | 550 °C | 600 °C | 650 °C | 700 °C |
| Ni/CaO    | 17.4                                         | 7.9    | 10.2   | 11.1   | 11.4   |
| Li-Ni/CaO | 16.5                                         | 3.0    | 5.8    | 7.8    | 7.5    |
| Na-Ni/CaO | 16.5                                         | 9.6    | 11.7   | 12.1   | 11.9   |
| K-Ni/CaO  | 16.5                                         | 8.8    | 11.0   | 11.7   | 11.3   |

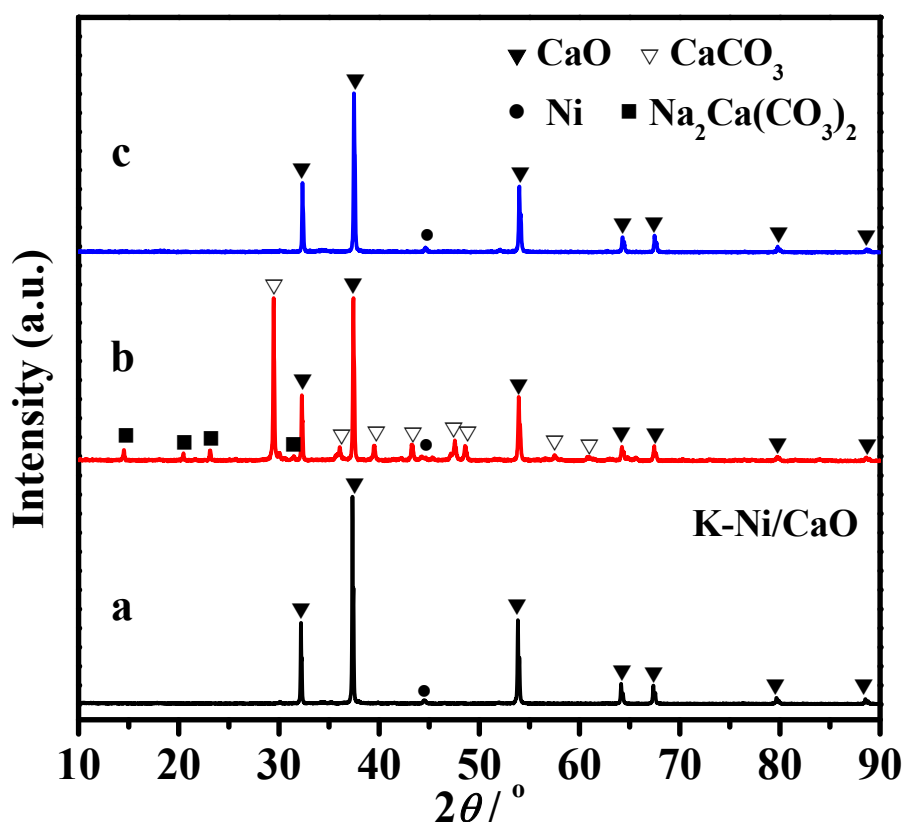

**Figure S2.** XRD pattern of the Na-Ni/CaO with 15 wt% Na doping after (a) the reduction; (b) the CO<sub>2</sub> capture stage and (c) the integrated CO<sub>2</sub> capture and hydrogenation.

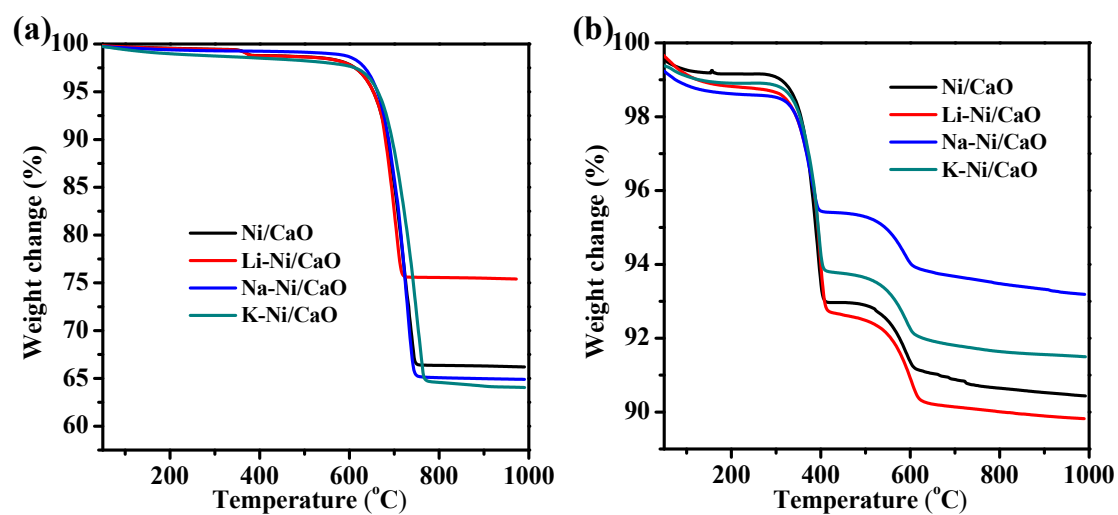

**Figure S3.** TG profiles of all DFMs (a) after the CO<sub>2</sub> capture stage and (b) the hydrogenation stage.

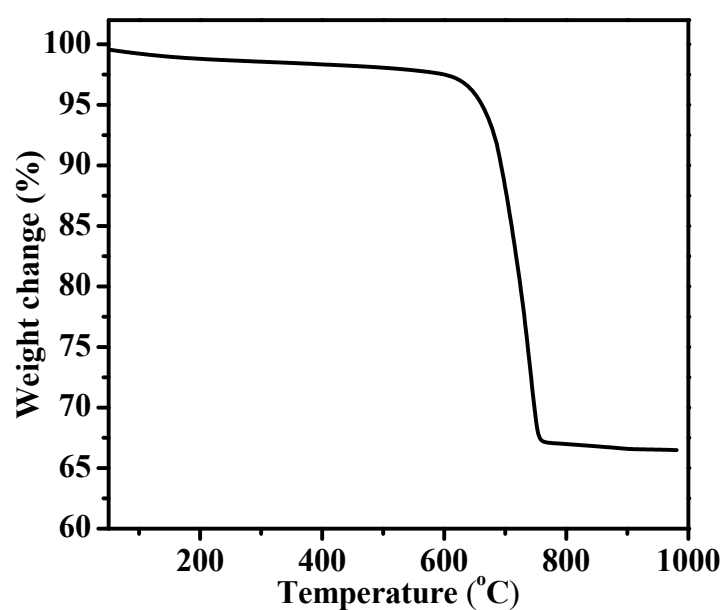

**Figure S4.** TG profile of the spent Na-Ni/CaO after adsorption in CO<sub>2</sub>/Ar for 1 h.

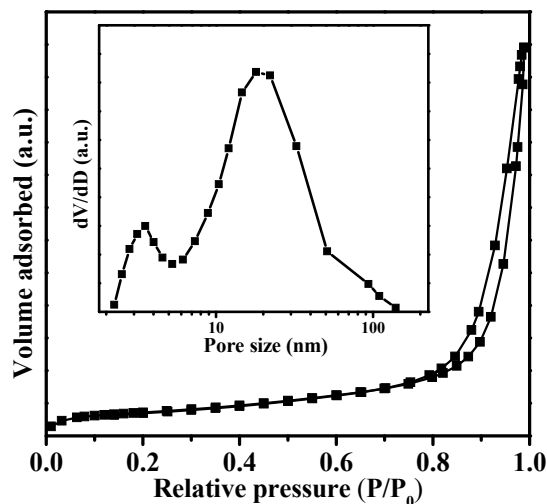

**Figure S5.** N<sub>2</sub> adsorption-desorption isotherms and pore size distribution (insert part) of spent Na-Ni/CaO DFM after 20 cycles of integrated CO<sub>2</sub> capture and hydrogenation.

**Table S3.** The combined CO<sub>2</sub> capture and hydrogenation performance over our proposed Na-Ni/CaO DFM and recently documented Ni/CaO based DFMs.

| DFMs                                                  | Preparation method       | Reaction    | Temperature (°C) | Feed composition<br>CO <sub>2</sub> capture + conversion       | CO <sub>2</sub> capacity (mmol/g) | Product yield (mmol/g) | Ref.      |
|-------------------------------------------------------|--------------------------|-------------|------------------|----------------------------------------------------------------|-----------------------------------|------------------------|-----------|
| Fe <sub>5</sub> Co <sub>5</sub> Mg <sub>10</sub> CaO  | One-pot sol-gel          | RWGS        | 650              | 10% CO <sub>2</sub> + 100% H <sub>2</sub>                      | 9.2                               | 8.28                   | 1         |
| 15NiCa                                                | Wet impregnation         | Methanation | 520              | 10% CO <sub>2</sub> + 10% H <sub>2</sub>                       | -                                 | 0.14                   | 2         |
| 15NiNa                                                |                          |             |                  |                                                                | -                                 | 0.19                   |           |
| Ca <sub>1</sub> Ni <sub>0.1</sub>                     | Sol-gel                  | RWGS        | 650              | 15% CO <sub>2</sub> + 5% H <sub>2</sub>                        | 15.0                              | 6.9                    | 3         |
| Ca <sub>1</sub> Ni <sub>0.1</sub> Ce <sub>0.033</sub> |                          | RWGS        | 650              | 15% CO <sub>2</sub> + 5% H <sub>2</sub>                        | 14.1                              | 7.3                    | 3         |
| Ni/CaO                                                |                          | Methanation | 500              | 10% CO <sub>2</sub> /10% H <sub>2</sub> O + 10% H <sub>2</sub> | 8.96                              | 8.34                   | 4         |
| Ni-CaO/γ-Al <sub>2</sub> O <sub>3</sub>               | impregnation             | Methanation | 320              | 9.5% CO <sub>2</sub> + 10% H <sub>2</sub>                      | 0.31                              | 0.14                   | 5         |
| 1%NiCaO                                               | One-pot                  |             |                  |                                                                | 9.2                               | 2.0                    |           |
| 1%Ni/CeO <sub>2</sub> -CaO-phy                        | physical mixing          | Methanation | 550              | 15% CO <sub>2</sub> + 100%                                     | 15.3                              | 8.0                    | 6         |
| Ni/CS-P30-C                                           | Sol-gel                  | RWGS        | 650              | 10% CO <sub>2</sub> + 5% H <sub>2</sub>                        | 13.86                             | 5.52                   | 7         |
| Ni/CS-P30-C-P                                         |                          |             |                  |                                                                | 8.95                              | 5.33                   |           |
| Ni/CeO <sub>2</sub> -CaO                              | physical mixture         | RWGS        | 650              | 10% CO <sub>2</sub> + 5% H <sub>2</sub>                        | 9.6                               | 2.7                    | 8         |
| Ni/CaO                                                | Precipitation-combustion | RWGS        | 650              | 10% CO <sub>2</sub> + 10% H <sub>2</sub>                       | 11.1                              | 6.3                    | This work |
| Na-Ni/CaO                                             |                          |             |                  |                                                                | 12.0                              | 7.0                    |           |

1. Shao, B.; Hu, G.; Alkebsi, K.A.M.; Ye, G.; Lin, X.; Du, W.; Hu, J.; Wang, M.; Liu, H.; Qian, F. Heterojunction-redox catalysts of  $\text{Fe}_x\text{Co}_y\text{Mg}_{10}\text{CaO}$  for high-temperature  $\text{CO}_2$  capture and in situ conversion in the context of green manufacturing. *Energy Environ Sci.* **2021**, *14*, 2291–2301.
2. Bermejo-López, A.; Pereda-Ayo, B.; González-Marcos, J. A.; González-Velasco, J. R. Ni loading effects on dual function materials for capture and in-situ conversion of  $\text{CO}_2$  to  $\text{CH}_4$  using  $\text{CaO}$  or  $\text{Na}_2\text{CO}_3$ . *J. CO<sub>2</sub> Util.* **2019**, *34*, 576–587.
3. Sun, H.; Wang, J.; Zhao, J.; Shen, B.; Shi, J.; Huang, J.; Wu, C. Dual functional catalytic materials of Ni over Ce-modified  $\text{CaO}$  sorbents for integrated  $\text{CO}_2$  capture and conversion. *Appl. Catal., B* **2019**, *244*, 63–75.
4. Jo, S. B.; Woo, J. H.; Lee, J. H.; Kim, T. Y.; Kang, H. I.; Lee, S. C.; Kim, J. C. A novel integrated  $\text{CO}_2$  capture and direct methanation process using Ni/ $\text{CaO}$  catal-sorbents. *Sustainable Energy Fuels* **2020**, *4*, 4679–4687.
5. Chai, K. H.; Leong, L. K.; Wong, D. S. H.; Tsai, D. H.; Sethupathi, S. Effect of  $\text{CO}_2$  adsorbents on the Ni-based dual-function materials for  $\text{CO}_2$  capturing and in situ methanation. *J. Chin. Chem. Soc.* **2020**, *67*, 998–1008.
6. Sun, H.; Wang, Y.; Xu, S.; Osman, A. I.; Stenning, G.; Han, J.; Sun, S.; Rooney, D.; Williams, P. T.; Wang, F.; Wu, C. Understanding the interaction between active sites and sorbents during the integrated carbon capture and utilization process. *Fuel* **2021**, *286*, 119308.
7. Wang, G.; Guo, Y.; Yu, J.; Liu, F. H.; Sun, J.; Wang, X.; Wang, T.; Zhao, C. Ni- $\text{CaO}$  dual function materials prepared by different synthetic modes for integrated  $\text{CO}_2$  capture and conversion. *Chem. Eng. J.* **2022**, *428*, 132110.
8. Sun, S.; Zhang, C.; Guan, S.; Xu, S.; Williams, P. T.; Wu, C. Ni/support- $\text{CaO}$  bifunctional combined materials for integrated  $\text{CO}_2$  capture and reverse water-gas shift reaction: Influence of different supports. *Sep. Purif. Technol.* **2022**, *298*, 121604.
